# 1 **Positional information encoded in the dynamic differences** 2 **between neighbouring oscillators during vertebrate segmentation.**

3 Marcelo Boareto<sup>1,2</sup>, Tomas Tomka<sup>1</sup> and Dagmar Iber<sup>1,2,\*</sup>

4

## 5 **Affiliations**

6 <sup>1</sup> *Department of Biosystems Science and Engineering (D-BSSE), ETH Zurich, Mattenstrasse*  
7 *26, 4058 Basel, Switzerland*

8 <sup>2</sup> *Swiss Institute of Bioinformatics, Mattenstrasse 26, 4058 Basel, Switzerland.*

9 \*Correspondence to: [dagmar.iber@bsse.ethz.ch](mailto:dagmar.iber@bsse.ethz.ch)

10

## 11 **Abstract**

12 A central problem in developmental biology is to understand how cells interpret their  
13 positional information to give rise to spatial patterns, such as the process of periodic  
14 segmentation of the vertebrate embryo into somites. For decades, somite formation has been  
15 interpreted according to the clock-and-wavefront model. In this conceptual framework,  
16 molecular oscillators set the frequency of somite formation while the positional information is  
17 encoded in signaling gradients. Recent experiments using *ex vivo* explants have challenged  
18 this interpretation, suggesting that positional information is encoded in the properties of the  
19 oscillators, independent of long-range modulations such as signaling gradients. Here, we  
20 propose that positional information is encoded in the difference in the levels of neighboring  
21 oscillators. The differences gradually increase because both the amplitude and the period of  
22 the oscillators increase with time. When this difference exceeds a certain threshold, the  
23 segmentation program starts. Using this framework, we quantitatively fit experimental data  
24 from *in vivo* and *ex vivo* mouse segmentation, and propose mechanisms of somite scaling.  
25 Our results suggest a novel mechanism of spatial pattern formation based on the local  
26 interactions between dynamic molecular oscillators.

27

## 28 **Introduction**

29 Pattern formation during embryonic development requires that the cells assess their spatial  
30 position. One useful conceptual framework to understand this process is to assume that each  
31 cell has a positional value that relates to its position in the coordinate system. The cells then  
32 use this positional information to coordinate their differentiation process (Wolpert, 1969).  
33 Based on this conceptual framework, Cooke and Zeeman proposed a model to explain the  
34 sequential and periodic formation of the somites in the vertebrate embryo (Fig. 1A). In their  
35 model, the positional information of the cells is given by a signaling wavefront, while a clock  
36 sets the frequency of somite formation (Fig. 1B) (Cooke and Zeeman, 1976).

37

38 The clock-and-wavefront model guided much of the experimental work done in the  
39 subsequent decades. The rhythm of segmentation has been shown to be accompanied by

40 travelling waves of gene expression, which sweep from the tail bud to the anterior end of the  
 41 presomitic mesoderm (PSM) (Masamizu et al, 2006). These waves emerge from the  
 42 oscillatory expression of 'clock' genes involved in the Notch pathway, such as *Lfng* and *Hes*  
 43 (McGrew et al 1998; Palmeirim et al., 1997; Forsberg et al, 1998; Dequeant et al., 2006; Niwa  
 44 et al., 2007). In the tail bud region, where the PSM cells are generated, *Fgf8* and *Wnt3* are  
 45 produced and as the cells cross the PSM their mRNA levels decrease due to degradation,  
 46 creating a gradient by inheritance (Dubrulle and Pourquié 2004; Aulehla et al, 2003).  
 47 Perturbations on Wnt and Fgf gradients have been shown to affect somite formation (Dubrulle  
 48 et al, 2001; Sawada et al, 2001; Naiche et al 2011), as required if the signaling gradients  
 49 encode the wavefront of somite formation.  
 50

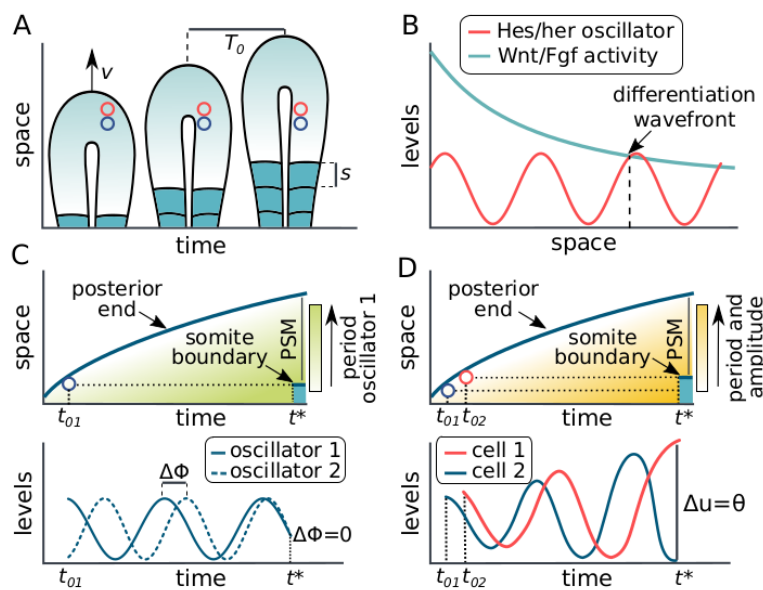

51  
 52 **Figure 1. Graphic representation and models of vertebrate segmentation.** A) During  
 53 embryonic development, the tail of the embryo extends due to the incorporation of new PSM  
 54 cells (red and blue circles) with a velocity ( $v$ ), and new segments ( $s$ ) are formed periodically  
 55 (period= $T_0$ ). B) Representation of the clock-and-wavefront model: a positional posterior-  
 56 anterior differentiation front (or wavefront) is created by a gradient of Wnt and Fgf activity. As  
 57 the tail grows, the cells cross the wavefront and are incorporated into a new somite. While  
 58 the wavefront defines the position of the new somite (dotted vertical lines), the oscillatory  
 59 expression of Notch genes forms a clock that defines the period of segmentation. C)  
 60 Representation of the phase-difference model: each cell has two oscillators, one oscillator  
 61 with a dynamic period (green area) and one with a fixed period. Positional information is  
 62 encoded in the differences in phase between the oscillators in each cell. Somite formation  
 63 will occur when the shift in the phase becomes sufficiently small, as represented at  $t=t^*$ . D)  
 64 Representation of the level difference model: positional information is encoded in the  
 65 differences in the levels of neighboring oscillators. Neighboring cells are added to tissue at  
 66 different time points ( $t_0$ ) and start with slightly different levels of the oscillator. These  
 67 levels accumulate due to differences in the period and amplitude (yellow area). Somite  
 68 formation will occur when the difference in the levels ( $\Delta u$ ) exceeds a threshold ( $\theta$ ), as  
 69 represented at  $t=t^*$ .

70 Recently, experiments of *ex vivo* explants have challenged the clock-and-wavefront view and  
71 favored an interpretation where the wavefront is implicit in the dynamics of the clock  
72 (Lauschke et al, 2013; Tsiaris and Aulehla 2016). In these experiments, tail bud tissue is  
73 explanted and forms a monolayer PSM (mPSM) with concentric travelling waves sweeping  
74 from the center of a dish to its periphery. Interestingly, after growth stops, segments begin to  
75 form, and the size of the segments scales with the size of the mPSM (Lauschke et al 2013).  
76 The formation of these segments in the absence of growth cannot be easily explained with  
77 the clock-and-wavefront model as it would require long-range mechanisms that sense the  
78 mPSM length.

79

80 Alternative models of somite formation have been proposed, as recently reviewed (Pais-de-  
81 Azevedo et al 2018). Among these models, the phase-difference model is able to explain  
82 segment scaling as observed in *ex vivo* explants. In this model, positional information is  
83 encoded in the phase of the oscillator (Goodwin and Cohen, 1969). Experiments using *ex*  
84 *vivo* explants have shown that the difference in phase between the cells in the center of the  
85 explant and the cells in the newly formed segment is constant and equal to  $2\pi$ , supporting the  
86 idea that the phase of the oscillator alone is a predictive parameter for the position of somite  
87 formation (Lauschke et al., 2013). However, this constant phase difference is not observed *in*  
88 *vivo*, as measured in zebrafish (Soroldoni et al, 2014). Therefore, for this model to work *in*  
89 *vivo*, an additional oscillator would be required in each cell and the wavefront would then be  
90 defined via the relative phase between these two cellular oscillators (Figure 1C, Lauschke et  
91 al., 2013). Network architectures that can compute such a relative phase of oscillation have  
92 been investigated (Beaupeux and François, 2016), and recent experiments show that the  
93 phase shift between Notch and Wnt signaling can control segmentation in *ex vivo* explants  
94 (Sonnen et al, 2018). It remains to be shown whether this mechanism can also explain *in vivo*  
95 segmentation.

96

97 The *Hes/her* genes, which are key targets of the Notch signaling pathway (Takke and  
98 Campos-Ortega, 1999; Bessho et al, 2001; Kageyama et al, 2007), are the central  
99 components of the cellular oscillators that control somite formation. In various species, these  
100 genes have been shown to oscillate due to a delayed autoinhibition, although there is a  
101 substantial variability in the gene network (Krol et al, 2011; Hirata et al 2002; Oates and Ho  
102 2002; Lewis 2003). In many species, the period of *Hes/her* oscillations increases in time as  
103 the cells move from the posterior to the anterior part of the PSM (Delaune et al, 2012; Shih et  
104 al, 2015; Gomez et al, 2008; Tsiaris and Aulehla, 2016). The same is true for the amplitude of  
105 the oscillators, as quantified in zebrafish (Delaune et al, 2012; Shih et al, 2015), and indirectly  
106 shown in mouse (Lauschke et al, 2013; Tsiaris and Aulehla, 2016). Interestingly, the temporal  
107 increase in period and amplitude correlates with the temporal decrease of Fgf and Wnt  
108 signaling due to mRNA degradation. Wnt activity has indeed been found to modulate the  
109 period of *Hes/her* oscillations in PSM cells (Gibb et al, 2009; Wiedermann et al, 2015;

110 Dubrulle et al, 2001; Sawada et al, 2001), but it remains to be tested whether Wnt activity  
111 also modulates the amplitude of these oscillators.

112

113 Here, we show that the positional information during somite formation can be encoded by a  
114 single molecular oscillator if its period and amplitude increase in time and space as measured  
115 for the *Hes/her* oscillator. A set of neighboring oscillators whose period and amplitude follow  
116 such a gradient generate travelling waves. This can be visualized in a pendulum wave  
117 experiment, where a set of pendulums with gradually increased lengths that start from the  
118 same initial condition display a travelling wave (Berg, 1991; Flaten and Parendo, 2001). We  
119 now show that the different levels of neighbouring oscillators can encode positional  
120 information during somite formation (Fig. 1D). Here, only a single molecular oscillator  
121 (*Hes/her*) is required per cell. When the PSM cells are incorporated in the tail bud region, they  
122 start with the same initial condition and *Hes/her* oscillations are synchronized with their  
123 neighbors. As the cells leave the tail bud region and cross the PSM, a temporal increase in  
124 the period and amplitude of *Hes/her* oscillations leads to a gradual increase in the difference  
125 of *Hes/her* levels in neighboring cells. Somite boundaries can then be triggered by a critical  
126 difference of *Hes/her* levels between neighbouring cells (Figure 1D). In the following, we first  
127 develop a theoretical framework for the proposed mechanism. We then show that our model  
128 quantitatively fits *in vivo* mouse segmentation from wild type and growth-perturbed embryos,  
129 captures temperature compensation in somite size and predicts a delayed scaling between  
130 somite size and PSM length. We further use data from different species to validate the  
131 predicted scaling between somite size and PSM length, and to suggest possible  
132 developmental mechanisms of somite size control. Lastly, we quantitatively fit data from  
133 mouse *ex vivo* explants, showing that the proposed mechanism can in principle explain data  
134 from both *in vivo* and *ex vivo* mouse segmentation.

135

## 136 **Results**

### 137 **Theoretical framework**

138 In our framework, each cell expresses an oscillatory protein  $u$  that represents a member of  
139 the *Hes/her* family. For simplicity, we represent the levels of  $u$  by a sine function:

140

$$u = A(x, t) \sin \phi(x, t), \quad (1)$$

141

142 where the amplitude  $A$  and the phase  $\phi$  depend on the position of the cell  $x$  and the time  $t$ .

143

144 After leaving the tail bud region, the amplitude and period of the oscillations increase over  
145 time in the PSM cells (Delaune et al, 2012; Shih et al, 2015). The exact functional form of this  
146 increase has not yet been determined. For convenience, we mathematically represent the  
147 increase in the amplitude ( $A$ ) and period ( $T$ ) by exponential functions:

148

$$A(x, t) = A_0 e^{\frac{\Delta t(x,t)}{\alpha}} \quad (2)$$

$$T(x, t) = T_0 e^{\frac{\Delta t(x,t)}{\beta}} \quad (3)$$

149

150 where  $A_0$  and  $T_0$  are the amplitude and period at the tail bud region, respectively, and  $\alpha$  and  $\beta$   
 151 are the characteristic time scale of amplitude and period gradients, respectively. Note that the  
 152 period and, consequently, the frequency are dependent on the amount of time a cell has  
 153 spent in the tissue. This time interval is given by  $\Delta t(x,t) = t - t_0$ , where  $t_0 = t_0(x)$  represents the  
 154 moment the cell in position  $x$  is incorporated into the PSM (Figure 2A). The body axis  
 155 elongates mainly by growth at the tail bud. Accordingly, the tail bud moves in the direction of  
 156 increasing  $x$ , while the position of each cell,  $x$ , in the PSM can be considered as fixed (Figure  
 157 2A).

158

159 The phase  $\phi$  of the cellular oscillator is related to the period ( $T$ ) and the frequency ( $\omega$ ) of the  
 160 oscillation according to

$$\frac{d\phi}{dt} = \frac{2\pi}{T(x,t)} = \omega(x,t) \quad (4)$$

161

162 which can be integrated to yield

163

$$\int_{\phi_0}^{\phi} d\phi = \frac{2\pi}{T_0} \int_{t_0}^t e^{-\frac{\Delta t(x,t)}{\beta}} dt, \quad (5)$$

$$\phi - \phi_0 = \frac{2\pi}{T_0} \left[ 1 - e^{-\frac{\Delta t(x,t)}{\beta}} \right] \beta, \quad (6)$$

$$\phi = 2\pi \left[ \frac{1}{T_0} - \frac{1}{T(x,t)} \right] \beta + \phi_0 = [\omega_0 - \omega(x,t)] \beta + \phi_0, \quad (7)$$

164

165 where  $\phi_0 = \omega_0 t_0(x)$  represents the initial phase and  $\omega_0 = \frac{2\pi}{T_0}$  the initial frequency of the  
 166 oscillator at the tail bud.

167

168 The slight difference in period and amplitude between neighboring cells leads to the temporal  
 169 accumulation of differences in their levels  $u$ . We propose that segmentation occurs when  
 170 these differences in  $u$  reach a certain threshold ( $\theta$ ). This can be represented mathematically  
 171 as:

$$\frac{\partial u}{\partial x} = \theta. \quad (8)$$

172 The derivative of  $u$  can be written as

173

$$\frac{\partial u}{\partial x} = \frac{\partial u}{\partial \phi} \frac{\partial \phi}{\partial x} + \frac{\partial u}{\partial A} \frac{\partial A}{\partial x}, \quad (9)$$

174 which leads to

$$\frac{\partial u}{\partial x} = A \cos \phi \frac{\partial \phi}{\partial x} + \sin \phi \frac{\partial A}{\partial x} = \theta. \quad (10)$$

175

176 By calculating the spatial derivatives  $\frac{\partial \phi}{\partial x} = (\omega_0 - \omega(x, t)) \frac{\partial t_0(x)}{\partial x}$  and  $\frac{\partial A}{\partial x} = -\frac{1}{\alpha} \frac{\partial t_0(x)}{\partial x} A$ , we have:

177

$$A \left[ (\omega_0 - \omega(x, t)) \frac{\partial t_0(x)}{\partial x} \cos \phi - \frac{1}{\alpha} \frac{\partial t_0(x)}{\partial x} \sin \phi \right] = \theta, \quad (11)$$

178

179 where the derivative

$$\frac{\partial t_0(x)}{\partial x} = \frac{1}{g_{t_0}} \quad (12)$$

180

181 is the inverse of the tail bud growth rate,  $g_{t_0}$ , at time  $t=t_0$  (Figure 2B). Combining Eqs. 11 and  
182 12, we obtain:

$$\frac{A}{g_{t_0}} \left[ (\omega_0 - \omega(x, t)) \cos \phi - \frac{1}{\alpha} \sin \phi \right] = \theta, \quad (13)$$

183

184 which can be rewritten as:

185

$$\frac{A_0 e^{\frac{\Delta t(x,t)}{\alpha}}}{g_{t_0}} \left[ \frac{2\pi}{T_0} \left( 1 - e^{\frac{-\Delta t(x,t)}{\beta}} \right) \cos \phi - \frac{1}{\alpha} \sin \phi \right] = \theta. \quad (14)$$

186

187 This implicit equation yields the time interval,  $\Delta t = t - t_0(x)$ , between the time a cell leaves the  
188 tail bud and the time it forms a segment (Fig. 2). As the tail bud is extending posteriorly with  
189 growth rate  $g$ , the time interval  $\Delta t$  determines the distance  $\Delta x$  between the posterior end  $L$   
190 and the segment boundary  $x$  (PSM length), as well as the distance between the previous and  
191 the new somite boundary, i.e. the size of the newly formed somite (Figure 2). Importantly,  
192 when forming a new somite, posterior cells reach the threshold before the anterior cells and  
193 the anterior part of the new somite experience high levels of the oscillatory protein (Figure  
194 S1), consistent with experimental observations in zebrafish (Shih et al, 2015).

195

196 The model has only 5 parameters: the characteristic time scale of the amplitude gradient ( $\alpha$ ),  
197 the characteristic time scale of the period gradient ( $\beta$ ), the tail bud growth rate ( $g_{t_0}$ ), the  
198 oscillation period at the tail bud ( $T_0$ ), and the normalized threshold for segmentation ( $\theta/A_0$ ).  
199 Importantly, these parameter values are all set at the time  $t_0$  when the cells leave the tail bud  
200 region. Consequently, after the cells have left the tail bud, only  $\Delta t$  changes. This leads to a  
201 timer mechanism of somite formation, independent of any spatial input.

202

203

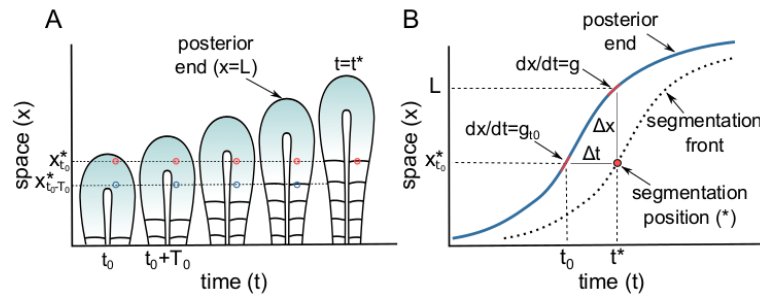

204

205 **Figure 2. Schematic representation of segmentation process.** A) The tail of the animal  
 206 grows as new cells are added into the tail bud. Red dot represent a cell that is added into the  
 207 tail bud at time ( $t=t_0$ ) and incorporated into the PSM at time ( $t=t^*$ ). B) The blue curve  
 208 represents the position of the posterior end in time, the red dot represents the position of  
 209 segmentation where  $du/dx=\theta$ . The variable  $\Delta t=t-t_0$  represents the amount of time since the  
 210 cell at position  $x^*$  was incorporated to the tissue and  $\Delta x=L-x^*$  is the distance of the cell  $x^*$   
 211 to the posterior end at the time  $t$ . The tail bud growth rates  $g_{t_0}$  and  $g$  represent the growth rate at  
 212 the tail bud at the time  $t_0$  and  $t^*$ , respectively. Note that  $t_0 = t_0(x)$  such that  $\frac{dt_0}{dx} = \frac{1}{g_{t_0}}$ .

213

214 **Model validation with quantitative data from growth-perturbed mouse somitogenesis.**

215 During mouse somitogenesis, the axial growth rate changes substantially and follows a  
 216 hump-shaped curve, an initial increase followed by a consecutive decrease (Tam 1981,  
 217 Figure S2). As a consequence of such growth profile, the axial length increases in a sigmoid-  
 218 like fashion during development (Tam 1981, Figure S2). In addition to the axial growth rate,  
 219 also the somite sizes and the PSM length change substantially during embryonic  
 220 development and are disturbed in animals that suffered drastic size reduction due to  
 221 treatment with DNA-synthesis inhibitor Mitomycin C (MMC) (Tam 1981). Interestingly,  
 222 although growth-perturbed (MMC-treated) embryos are significantly smaller than wild type  
 223 (WT) at early stages, these embryos show compensatory growth, resulting in an embryo with  
 224 normal final size (Tam 1981, Figure S2). Such compensatory growth, however, leads to a  
 225 disturbed somitogenesis where both the PSM length and somite size are smaller compared to  
 226 WT embryos (Tam 1981, Figure S3). We sought to use this data to test whether our model  
 227 would be able to correctly reproduce the measured changes in somite sizes and PSM lengths  
 228 for the different growth rates at the different embryonic stages, and in the different growth  
 229 conditions.

230

231 The time-dependent tail bud growth rate  $g(t)$  can be inferred from the experimental data and  
 232 is then used as input to the model (Tam 1981, Figures 3A and S2). When we keep all other  
 233 parameters fixed during the segmentation process, the model fails to reproduce somite size  
 234 and PSM length (Tam 1981, Figure S4A-C). In the next step, we investigated the case where  
 235 the amplitude and period in the tail bud is not constant over time, but depends on the varying  
 236 growth rate  $g_{t_0}$  in the tail bud (Figure 3A). We use an exponential relationship

237

$$A_0 = A'_0 e^{-\frac{g_{t_0}}{\gamma}} \quad (15)$$

$$T_0 = T'_0 e^{-\frac{g_{t_0}}{\gamma}} \quad (16)$$

238

239 with an additional parameter  $\gamma$ . Eq. 14 remains valid since both  $g_{t_0}$  and  $\gamma$  are independent on  
 240  $x$ . The extended model fits the segmentation period (Figure S4) as well as the measured  
 241 PSM lengths (Figure 3C,D; Fig. S4E) and somite sizes (Figure 3E,F; Fig. S4F), both in control  
 242 and MMC-treated embryos. The difference in the growth rate between WT and MMC-treated  
 243 embryos (Figure 3A,B) alone is, however, not sufficient to explain the differences in somite  
 244 size and PSM length between these two conditions (Figure 3G). In particular, the  
 245 characteristic time scale of the amplitude gradient ( $\alpha$ ) must additionally differ between these  
 246 conditions.

247

248 These results show that our framework quantitatively reproduces mouse segmentation *in vivo*  
 249 as long as a modulation in the growth rate additionally affects the characteristic time scale of  
 250 the amplitude gradient, suggesting a link between the growth rate and the properties of the  
 251 cellular oscillators.

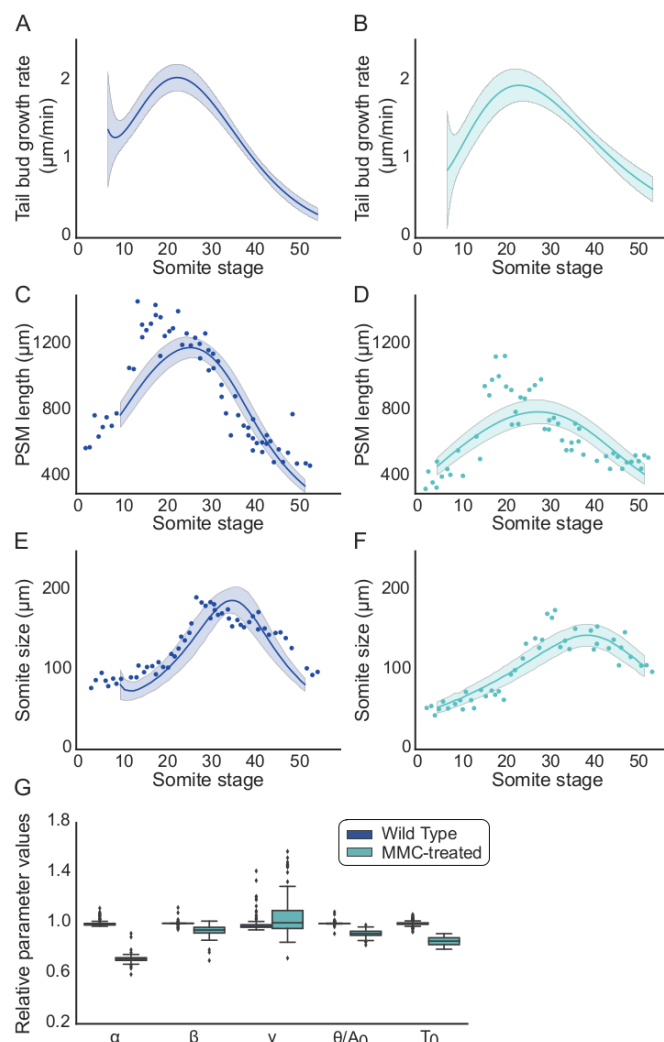

252



253 **Figure 3. Model validation with segmentation data from control and MMC-treated**  
254 **mouse embryos.** A) Inferred tail bud growth rate,  $g$ , for different somite stages of WT and B)  
255 MMC-treated embryos. Tail bud growth rates were inferred from experimental data (Tam  
256 1981, Figure S2). Lines represent the average fit of a bootstrap resampling and the area  
257 represents the 95% confidence interval. C) PSM length for different somite stages for WT and  
258 D) MMC-treated embryos. E) Somite size for different somite stages for WT and F) MMC-  
259 treated embryos. C-F) Dots represent data from (Tam 1981), lines represent the average fit  
260 and the area represents the 95% confidence interval of the model prediction. A total of 100  
261 simulations were evaluated using different fits of the tail bud growth rate, obtained via  
262 bootstrap, as an input. G) Comparison of parameter values that best fit the data for WT and  
263 MMC-treated embryos. Values are normalized by the average values of WT embryos, which  
264 are presented in Table 1.

265

266 **Somite size and PSM length are determined at the tail bud and depend on the time-**  
267 **varying growth rate.**

268 Somite size scales with body size (Cooke 1975) and even in *ex vivo* explants the segment  
269 size scales with mPSM size (Lauschke et al, 2013). In addition, measurements in mouse  
270 reveal an intriguing temporal relationship between the growth rate, PSM length and somite  
271 size: all three curves follow a hump shape (Tam 1981, Figure 3). The peak of the growth rate  
272 coincides approximately with the peak of PSM length, while the peak of the somite size is  
273 delayed in relation to growth rate and PSM length (Tam 1981, Figures 3, S2,3). What  
274 determines the relative size of somites and PSM? And what determines this delay?

275

276 The size of a somite ( $s$ ) is defined by the difference between the position of the new segment  
277 formed at  $t=t^*$  ( $x^*_{t^*}$ ) and the position of the new segment formed at  $t=t^*-T_0$  ( $x^*_{t^*-T_0}$ ). The position  
278 of segment formation can be estimated by integrating the growth rate until the moment the  
279 cell is incorporated into the tissue  $t=t_0$  (Figure 2A),

280

$$s = x^*_{t_0} - x^*_{t_0-T_0} = \int_0^{t_0} g(t)dt - \int_0^{t_0-T_0} g(t)dt = \int_{t_0-T_0}^{t_0} g(t)dt. \quad (17)$$

281

282 Assuming that the growth rate is constant in the time period  $[t_0-T_0, t_0]$  that corresponds to one  
283 somite stage, the size of the somite is approximately

284

$$s \approx g_{t_0} T_0. \quad (18)$$

285

286 The size of the somite,  $s(t)$ , that is formed at time  $t$  thus depends on the growth rate,  $g_{t_0}$ , and  
287 the period,  $T_0$ , when the cells are incorporated into the PSM.

288

289 What about the PSM? According to our model, the size of the PSM ( $P$ ) is directly proportional  
290 to the tail bud growth rates

291

$$P = L - x_{t_0}^* = \int_0^{t^*} g(t)dt - \int_0^{t_0} g(t)dt = \int_{t_0}^{t^*} g(t)dt. \quad (19)$$

292

293 Assuming again that the growth rate is constant in the time period  $[t_0, t^*]$ , the size of the PSM  
294 is approximately:

$$P = g_{t_0}(t^* - t_0). \quad (20)$$

295

296 Accordingly, the PSM length achieves its maximum soon after the growth rates peaks, which  
297 is consistent with the mouse data (Tam 1981; Figure 3).

298

299 So how long is the delay between the maximal somite size and the maximal growth rate? This  
300 delay is proportional to the time it takes the cells from being added into the PSM ( $t=t_0$ ) to be  
301 incorporated into a new somite ( $t=t^*$ ). One simple way to estimate this is to count how many  
302 somites have to be formed until the cells that are in the tail bud become incorporated into a  
303 new somite. This can be estimated by dividing the size of the PSM by the size of the somites,  
304 giving a good estimate in somite stages (Figure 2A). Another way to estimate this delay is to  
305 use equations 18 and 20 as a constant growth rate is a good approximation around the  
306 somite stages where the growth rate is maximal. In this case, we obtain that the delay ( $\tau$ ) is  
307 given by:

$$\tau = t^* - t_0 \approx \frac{P}{s} T_0. \quad (21)$$

308

309 Therefore, our model predicts a delayed scaled relationship between the PSM length and  
310 somite size, where the delay is approximately the ratio PSM length to somite size ( $P/s$ ). To  
311 confirm that this relationships indeed holds when growth rates change over time, we  
312 considered an idealized hump-shaped tail bud growth rate curve (Figure 4A): the difference in  
313 the peaks of PSM length and somite size approximately corresponds to the amount of time  
314 the cells spend to cross the PSM, which is approximately the ratio  $P/s$  (Figure 4B). Finally, we  
315 compared the measured differences in the peaks of somite size and PSM length for mouse,  
316 chicken and snakes: as predicted by our model, this difference, in somite stages, is  
317 approximately the ratio  $P/s$  (Figure 4C, Gomez et al, 2008).

318

319 These results support the idea that the size of the somites depends on the growth rate at the  
320 time the cells are at the tail bud. Such a relationship is consistent with our timer-based model  
321 (Eq. 14) where all properties are defined at the moment when the cells enter the PSM and  
322 somite formation does not require additional spatial inputs, but would not be consistent with  
323 the clock-and-wavefront model with its positionally controlled segmentation front. The clock-  
324 and-wavefront model reproduces Eq. 18 only in case of a constant growth rate, while our  
325 model can explain the observed relationship between PSM length and somite size also for  
326 time-varying growth rates. A timer mechanism, as we propose, is also consistent with

327 observations in zebrafish where the determination front is defined already a few somite  
328 stages before segmentation occurs (Akiyama et al, 2014). Similarly, PSM cells in the mouse  
329 are organized into segmental units before segmentation (Tam 1981).  
330

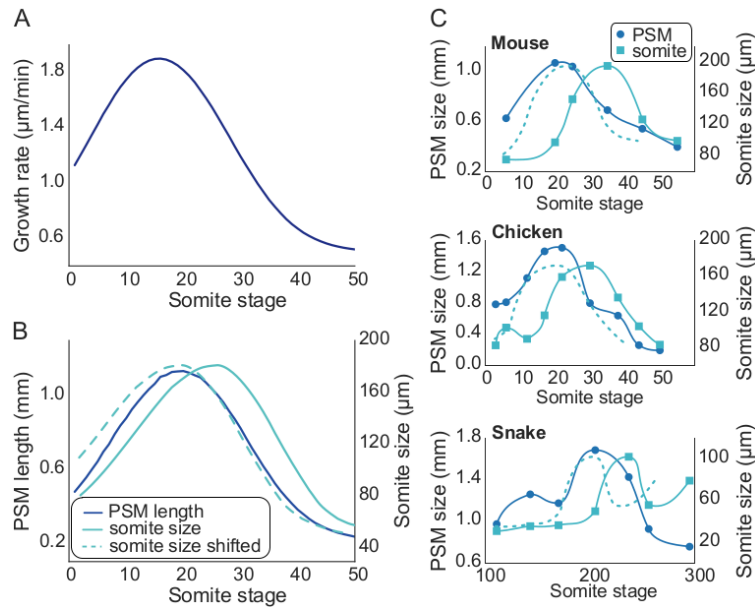

331

332 **Figure 4. Relationship between tail bud growth rate, somite size and PSM length for**  
333 **dynamic growth rates.** A) Tail bud growth rate for different somite stages. B) Inferred PSM  
334 length (blue curve) and somite size (green curve) for the tail bud growth rate presented in A)  
335 and with parameters consistent with mouse segmentation (Table 1). The dashed green line  
336 represents the somite size curve shifted by the ratio PSM/somite size at the somite stage  
337 when PSM length is maximum. C) Experimental measurements of PSM length and somite  
338 size during different embryonic stages for mouse, chicken and snake obtained from (Gomez  
339 et al, 2008). The dashed curve represents the somite size curve shifted by the ratio  
340 PSM/somite size at the somite stage when PSM length is maximum.

341

#### 342 **Evolutionary mechanisms of vertebrate segmentation.**

343 There is a large diversity in somite size, number and frequency among vertebrate species,  
344 but little is known about the evolutionary mechanisms that lead to such diversity (Gomez et al,  
345 2009). For example, while mouse and chicken share similar segmentation properties, snakes  
346 and zebrafish have somites three to four times smaller (Figure 5A). Interestingly, snakes and  
347 zebrafish achieve smaller somites via different mechanisms. In zebrafish, smaller somites are  
348 mostly due to a decrease in the period of oscillations, while snakes have smaller somites due  
349 to slower growth rates (Gomez et al, 2008; Figure 5A). This suggests that differences in the  
350 growth rate and period of oscillations are the main evolutionary mechanism to achieve  
351 somites with different sizes. But are the changes in these parameters sufficient to explain  
352 segmentation properties of these different species? To answer that, we used our model to  
353 estimate somite size and PSM length for different values of growth rate and oscillation period  
354 in the tail bud. We found that changes in these parameters alone are sufficient to explain  
355 somite size, but not the observed PSM length (Figure S5).

356

357 We further asked if concomitant changes in the characteristic length of the gradients ( $\alpha$  and  
 358  $\beta$ ) could explain changes in both somite size and PSM length. The differences in the period at  
 359 the posterior end and at the anterior part of the PSM scales with PSM length in a similar  
 360 fashion between snakes and zebrafish (Gomez et al, 2008). This suggests that the slowing  
 361 down of the oscillations is similar in different species:

362

$$\left(\frac{T_{ant}}{T_0}\right)_{specie_1} = \left(\frac{T_{ant}}{T_0}\right)_{specie_2}. \quad (22)$$

363 Consequently:

$$\left(e^{-\frac{\tau}{\beta}}\right)_{specie_1} = \left(e^{-\frac{\tau}{\beta}}\right)_{specie_2}, \quad (23)$$

364

365 which leads to a relationship between the characteristic time scale of the period gradient ( $\beta$ )  
 366 and the time the cells take to cross the PSM ( $\tau$ ):

367

$$\frac{\beta_1}{\beta_2} = \frac{\tau_1}{\tau_2}. \quad (24)$$

368

369 As previously discussed (Eq. 21), the time the cells take to cross the PSM can be inferred in  
 370 terms of the PSM length and somite size:

371

$$\tau \approx \frac{P}{s} T_0. \quad (25)$$

372

373 Using data from different species, we inferred the following relationship between  $P/s$  and  $g$   
 374 (Figure 5B):

$$\frac{P}{s} \sim g^{-1.5}, \quad (26)$$

375

376 and by combining Eqs 24-26, we can then estimate the inter-species ratio of the characteristic  
 377 length of the period as a function of changes in the growth rate and period at the tail bud:

378

$$\frac{\beta_1}{\beta_2} = \frac{(g^{-1.5} T_0)_1}{(g^{-1.5} T_0)_2}. \quad (27)$$

379

380 Assuming that the inter-species ratio of the characteristic length of the amplitude follows the  
 381 same relationship, we have:

$$\frac{\alpha_1}{\alpha_2} = \frac{(g^{-1.5} T_0)_1}{(g^{-1.5} T_0)_2}. \quad (28)$$

382

383 If we derive the  $\alpha$  and  $\beta$  for the other species with equations 27 and 28 based on the  $\alpha$  and  $\beta$   
 384 that we previously inferred from experimental data for the mouse (Figure 3, Table 1), we  
 385 correctly estimate the somite size and PSM length for mouse, chicken, snake and zebrafish  
 386 (Figure 5C-D). In addition, we observe a much larger number of stripes of the oscillatory  
 387 protein in the PSM of snakes compared to zebrafish, mouse and chicken, which is consistent  
 388 with experimental observations (Figure 5E; Gomez et al, 2009).  
 389  
 390 These results suggest a developmental mechanism of somite size control, where a decrease  
 391 in the growth rate leads to an increase in the characteristic length of the amplitude and period  
 392 gradients ( $\alpha$  and  $\beta$ ), which consequently leads to an increase PSM length to somite size  
 393 ( $P/s$ ). We predict that the ratio  $P/s$  increases as the tail bud growth rate decreases (Eq. 26). It  
 394 would be interesting to measure these parameters in other species to further confirm the  
 395 existence of such a relationship.

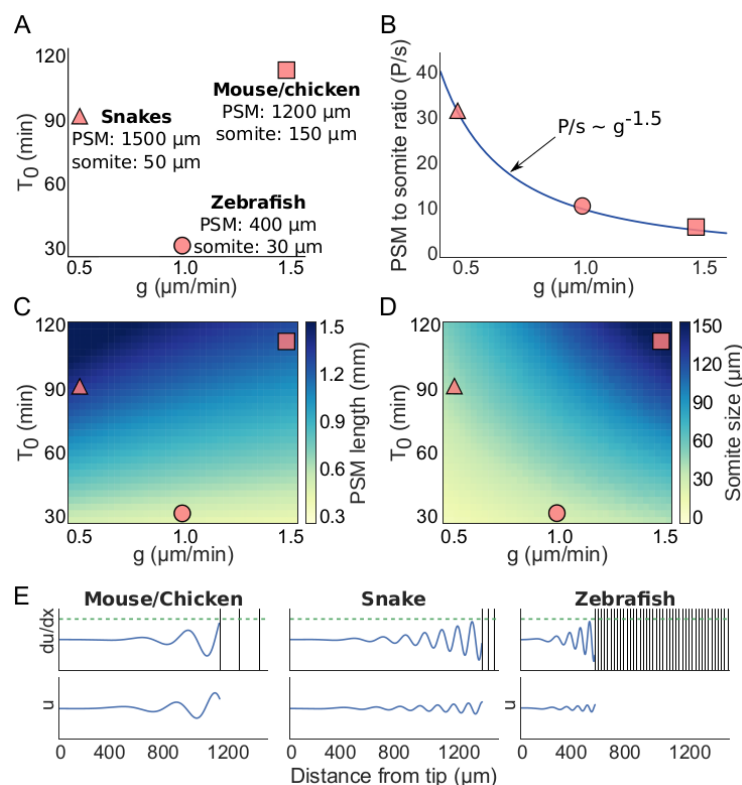

396  
 397 **Figure 5. Segmentation properties of different vertebrate species.** A) Representation of  
 398 the estimated overall growth rate and period in the tail bud, PSM length and somite size for  
 399 mouse and chicken, snakes and zebrafish (Gomez et al, 2008). B) Relationship between  
 400 PSM/somite size ratio ( $P/s$ ) and the tail bud growth rate for different species. Blue line  
 401 represents the fit that relates the ratio  $P/s$  to the growth rate. C) PSM length and D) somite  
 402 size for different values of growth rate and period at the tail bud. We considered that changes  
 403 in the growth rate and the period of oscillations also affect the steepness of the gradients. E)  
 404 Representation of the values of  $u$  and  $\partial u/\partial x$  for different species. Dashed green lines  
 405 represent the threshold  $\theta$ , while dark vertical lines represent the position of formed segments.  
 406

407 **Three model parameters mainly determine somite size, PSM length, and the**  
 408 **segmentation period**

409 In our analysis above, we noticed differences in how the growth rate,  $g$ , and the characteristic  
 410 length of the amplitude gradient ( $\alpha$ ) affected somite size and PSM length. To discern the  
 411 individual impact of each parameter in our model, we carried out a parameter sensitivity  
 412 analysis. To this end, we performed a perturbation on the values of each parameter and  
 413 assessed the effect on somite size, PSM length, and the segmentation period. Here, we used  
 414 a constant tail bud growth rate,  $g$ , such that the PSM length and somite size do not change  
 415 during the segmentation process (Eq.17-20) (Figure 6A,B). To study the individual effects of  
 416 parameters, we used the model where the period and amplitude are independent of the tail  
 417 bud growth rate (Eq. 2,3), but the same conclusions hold also when they are dependent (Eq.  
 418 15,16) (Figure S6). The sensitivity analysis reveals that PSM length, somite size and  
 419 segmentation period are controlled mostly by three key parameters: the tail bud growth rate  
 420 ( $g$ ), the oscillation period at the tail bud ( $T_0$ ), and the characteristic length of the amplitude  
 421 gradient ( $\alpha$ ). Here,  $g$  positively regulates both PSM length and somite size,  $T_0$  positively  
 422 regulates both the somite size and segmentation period, and  $\alpha$  positively regulates the PSM  
 423 length (Figure 6C).

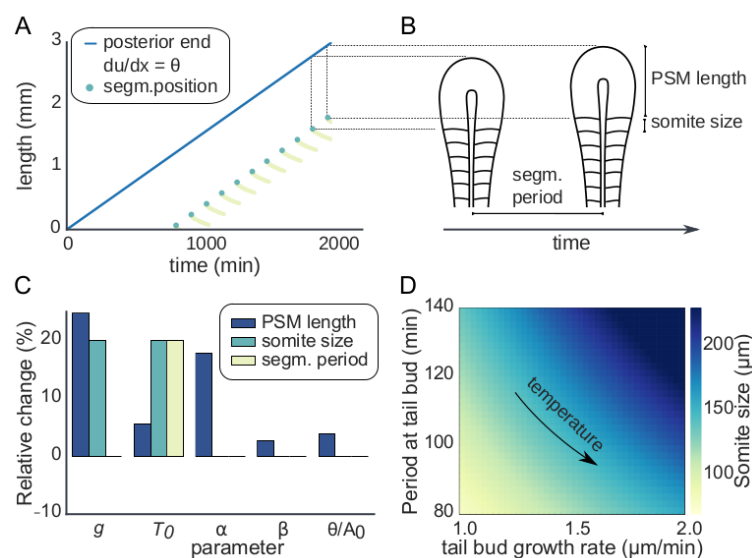

424 **Figure 6. Segmentation properties at constant tail bud growth rate.** A) Position of  
 425 posterior end (blue line) and position of segmentation in time. Yellow dots represent the  
 426 points where  $\partial u / \partial x = \theta$  and green dots represent where a new segment is formed. The  
 427 formation of a new segment happens when  $\partial u / \partial x = \theta$  is satisfied in a position  $x$  such that  $x >$   
 428  $x_s$ , where  $x_s$  is the position of the previous segment. The phase of the cells during  
 429 segmentation is the same during the whole process (Figure S1). Note that caudal cells reach  
 430 the threshold before the rostral cells within a somite length. B) Graphical representation of  
 431 segmentation process. Assuming constant tail bud growth rate, the PSM lengthening is  
 432 exactly the size of one somite during one segmentation period. C) Parameter sensitive  
 433 analysis. Each parameter is increased in 20% of its standard value (Table 1). The tail bud  
 434 growth rate ( $g$ ), clock period at posterior end ( $T_0$ ), and the characteristic length of amplitude  
 435 gradient ( $\alpha$ ) are the most sensitive parameters, i.e., lead to changes of more than 10% of  
 436

437 either PSM length, somite size and segmentation period. PSM length is regulated by both  $g$   
438 and  $\alpha$ , somite size is regulated by both  $g$  and  $T_0$ , and segmentation period is controlled by  $T_0$ .  
439 D) Somite size for different values of  $T_0$  and  $g$ . If an increase in  $g$  is accompanied by a  
440 proportional decrease in  $T_0$ , the size of somites remains the same, suggesting a temperature  
441 compensation mechanism.

442

#### 443 **Somite size is temperature compensated and controlled by tail bud growth rate and** 444 **clock period.**

445 Intriguingly, somite size in zebrafish remains the same when embryos are grown at different  
446 temperatures, even though the growth rates and oscillation periods change substantially with  
447 temperature (Oates et al, 2012). In fact, according to the clock-and-wavefront model and  
448 consistent with experimental data, the combined changes in the growth rate and the  
449 oscillation period compensate in a way that the somite size remains constant (Schröter et al,  
450 2008; Oates et al, 2012). Also, in our model, the size of the somite is affected in the same  
451 way by the tail bud growth rate and the oscillation period (Figure 6C), and the somite size  
452 remains constant when the growth rate and the oscillation period in the tail bud are changed  
453 in parallel (Figure 6D). This further suggests that a molecular mechanism exists that couples  
454 the oscillation period and probably also the oscillation amplitude to the growth rate (Eq.  
455 15,16).

456

#### 457 **Pattern scaling of ex vivo explants with different temperatures.**

458 Cells from the PSM self-organize into monolayer PSM (mPSM) structures when explanted *in*  
459 *vitro* (Lauschke et al, 2013; Tsiairis and Aulehla 2016). These structures show many  
460 properties that resemble *in vivo* segmentation. For example, the activity of Wnt and Fgf is  
461 higher in the cells in center of the tissue and lower in the cells close to the periphery, forming  
462 a center to periphery gradient which is similar to the posterior to anterior gradient observed *in*  
463 *vivo*. Also, a period and amplitude gradient from center to periphery is observed. Moreover,  
464 segmentation is observed from the periphery to the center of the tissue, leading to a gradual  
465 shrinkage of the mPSM. Interestingly, the size of the segments scales with the size of the  
466 remaining mPSM. In contrast to what is observed *in vivo*, however, there is no growth during  
467 *ex vivo* segmentation and the cells stay in a fixed position in relation to the center of the  
468 mPSM.

469

470 While the period gradient in mPSM explants has previously been described by a time-  
471 dependent function (Lauschke et al, 2013), we noted that the data can as well be described  
472 with a period gradient that only varies in space, but not in time (Supplementary Information,  
473 Figures S8,9). In the spirit of parsimony, we therefore assume that the period and amplitude  
474 gradients change only over space, but not with time; we note that a time-varying period  
475 gradient would yield similar results. We thus describe the amplitude and period gradients by

476

$$A(x) = A_0 e^{\frac{\Delta x}{\alpha}} \quad (29)$$

$$T(x) = T_0 e^{\frac{\Delta x}{\beta'}} \quad (30)$$

477

478 Here,  $\alpha'$  and  $\beta'$  are the characteristic spatial length of the amplitude and period gradients,  
479 respectively, and  $\Delta x = L - x$ , is the distance of the cell  $x$  to the center of the mPSM ( $L$ ). The  
480 position of segmentation is then be determined by:

481

$$\frac{\partial u}{\partial x} = A \left[ \frac{\omega \Delta t}{\beta'} \cos \phi - \frac{1}{\alpha'} \sin \phi \right] = \theta. \quad (31)$$

482

483 We emphasize that in case of a static period gradient, the phase of the oscillators,  $\phi(x) =$   
484  $\omega(x)\Delta t$ , changes in time. We then use Eq. 31 to fit the relationship between somite size and  
485 wave velocity with PSM length for explants at different temperatures (Figure 7A-E; Lauschke  
486 et al, 2013). We noted that most parameters do not change, except the period of oscillations,  
487  $T_0$ , which must be longer for explants at lower temperature (Figure 7E). This is consistent with  
488 experimental measurements showing that explants at lower temperature have a longer  
489 overall oscillation period (Figure 7F; Lauschke et al, 2013).

490

491 Taken together, these results suggest that our framework is able to reproduce somite  
492 formation from both *in vivo* and *ex vivo* data. The critical difference between both cases is  
493 that a spatial gradient emerges in *ex vivo* explants by self-organisation, leading to a scaling of  
494 segment size with the mPSM, whereas *in vivo*, the tail bud growth controls the delayed  
495 scaling between somite size and PSM length.

496



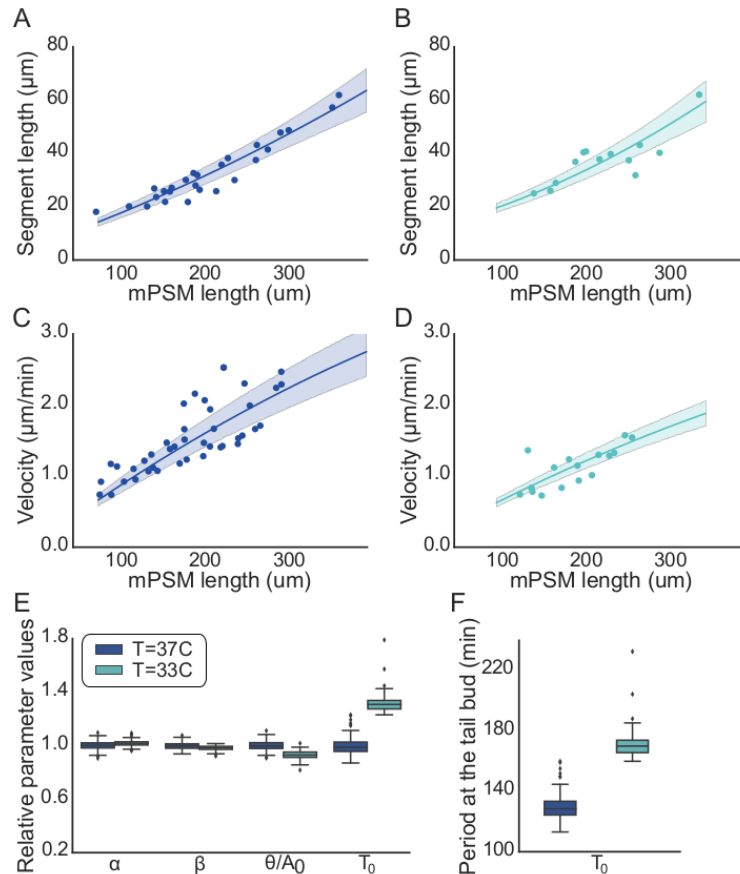

497

498 **Figure 7. Properties of mouse segmentation in ex vivo explants at different**  
 499 **temperatures.** A) Segment size and mPSM length for explants at 37°C and B) 33°C. C)  
 500 Wave velocity and PSM length for explants at 37°C and D) 33°C. The wave velocity is defined  
 501 by the mPSM divided by the time to form the segment. A-D) Dots represent data from  
 502 (Lauschke et al, 2013), lines represent the average fit and area represent the 95% confidence  
 503 interval of the model prediction. E) Comparison of parameter values that best fit the data for  
 504 explants at temperatures 37°C and 33°C. The values are normalized by the average values of  
 505 explants at 37°C. Changes in the period at the center of the mPSM ( $T_0$ ) are required to fit  
 506 explants from different temperatures. F) The predicted increased period for explants at lower  
 507 temperatures is consistent with experimental observations of an overall period of 137.4 min  
 508 and 193.4 min for explants at 37°C and 33°C (Lauschke et al, 2013). Moreover, in order to fit  
 509 explants at 37°C our model requires a period at the center of the explant of around 130 min,  
 510 which is consistent with the value obtained experimentally of 132 min (Lauschke et al, 2013).

511

## 512 Discussion

513 Here, we propose a novel mechanism of spatial pattern formation that does not require any  
 514 long-range interactions, such as morphogen gradients, to define the position of somite  
 515 boundaries. It requires only a single cellular oscillator in each cell with a temporal modulation  
 516 in the period and amplitude, as experimentally observed (Delaune et al, 2012; Shih et al,  
 517 2015; Gomez et al, 2008; Tsiaris and Aulehla, 2016). Because the oscillators have slight  
 518 differences in the period and amplitude in neighboring cells, the differences in the levels  
 519 between neighboring oscillators increase temporally. We propose that once this difference is

520 large enough, the segmentation program starts. This leads to a timer mechanism, where the  
521 program of somite formation is already encrypted into the cells before they leave the tail bud  
522 region. After that, the cells only need to compare the levels of their oscillator with their  
523 neighbor's to decide when it is time to form a new segment.

524

525 The model succeeds in reproducing the measured time-varying PSM length and somite sizes  
526 in both WT and growth disturbed mouse embryos (Fig. 3), as well as in *ex vivo* mouse  
527 explants at different temperatures (Fig. 7). Moreover, our model establishes a relationship  
528 between somite size, PSM length and growth rates (Eq. 17-20). The PSM length is  
529 proportional to the growth rate and consequently the rate of shrinkage of the PSM length is  
530 proportional to dynamic changes in the tail bud growth rate, and does not require changes in  
531 the properties of the signaling gradients, as required by the clock-and-wavefront model.  
532 According to our timer mechanism, somite size is determined at the moment the cells leave  
533 the tail bud and is proportional to the period of the oscillators at the tail bud and the tail bud  
534 growth rate at the time the cells are incorporated into the tissue (Eq. 18). In the case of  
535 constant growth rates, our model leads to the same prediction as the clock-and-wavefront,  
536 since the wavefront velocity is the same as the tail bud growth rate. However, at least in the  
537 mouse, the growth rates vary substantially during somitogenesis (Fig. 3). In the case of  
538 dynamic growth rates, because the size of the somites are defined much earlier, our model  
539 predicts a delayed scaling between PSM length and somite size, where the delay is  
540 approximately the ratio PSM/somite size (Eq. 21). We showed that experimental data from  
541 different species is in agreement with this prediction (Figure 4), supporting the idea that the  
542 somite segmentation is controlled by a timer mechanism rather than a spatial wavefront.

543

544 There are three key requirements for our mechanism to work: i) There must be an increase in  
545 period and amplitude over time. ii) There must be a link between the amplitude and period  
546 dynamics and the growth rate. iii) A molecular mechanism must exist that allows cells to  
547 sense a difference between the value of their intracellular oscillator and that of their  
548 neighbours. The first requirement, that the period and amplitude of Hes/her oscillators  
549 increase over time, has been established experimentally (Delaune et al, 2012; Shih et al,  
550 2015; Gomez et al, 2008; Tsiaris and Aulehla, 2016), but it is not known how this increase is  
551 regulated and whether and how it may be linked to the growth rate. Experimental  
552 observations suggest a link via Wnt signalling. Thus, as cells enter the PSM, the levels of Wnt  
553 start to decrease over time due to mRNA decay (Aulehla et al, 2003). The decay of Wnt  
554 activity has been found modulate the period of Hes/her oscillations in PSM cells (Gibb et al,  
555 2009; Wiedermann et al, 2015; Dubrulle et al, 2001; Sawada et al, 2001), and also to  
556 modulate growth at the tail bud (Amin et al, 2016). Whether Wnt also modulates the  
557 amplitude of the oscillators remains to be confirmed. These results suggest the possibility that  
558 Wnt activity link the properties of the oscillators such as the characteristic time scale of the  
559 amplitude and period gradients ( $\alpha$  and  $\beta$ ) with the growth rate. The coupling between the

560 properties of the oscillators and growth has previously been shown to lead to a segmentation  
561 process that can account for PSM shrinking and growth termination (Jörg et al, 2015; Jörg et  
562 al, 2016), and in our model, it is required in order to fit data from different species (Figure 5).  
563 Moreover, such coupling suggests a possible developmental mechanism of somite size  
564 control. Species with low metabolic rates, such as snakes, have low growth rates and also  
565 slower mRNA degradation. Therefore, in these species, Wnt activity would decay more slowly  
566 and as a consequence, the changes in the properties of the oscillators would also be slower,  
567 as represented by an increased time scale of the amplitude and period gradients ( $\alpha$  and  $\beta$ ).  
568 As both,  $\alpha$  and  $\beta$ , modulate the PSM length, but not somite size (Figure 6C), species with  
569 slower metabolism would have a larger PSM to somite size ratio and lower growth rates, as  
570 observed when comparing different species (Gomez et al, 2008; Figure 5B).

571  
572 Lastly, our model requires the existence of a molecular mechanism that enables neighboring  
573 cells to compare their protein concentration to obtain their positional information. The Hes/her  
574 oscillations are part of the Notch pathway. PSM cells communicate with their neighbors via  
575 Notch/Delta signaling, and Notch signaling has been shown to control *Mesp2*, which is  
576 required to initiate somite segmentation (Takahashi et al, 2000; Morimoto et al, 2005;  
577 Yasuhiko *et al.* 2006). It is possible that as long as the differences in amplitude and period  
578 are small between oscillators, communication between neighboring cells maintains  
579 oscillations synchronized (Riedel-Kruse et al., 2007; Delaune et al., 2012; Jiang et al, 2000;  
580 Tomka et al, 2018). However, once the differences exceed a critical value, entrainment  
581 breaks. Based on this, one would expect oscillators in the PSM to remain entrained until  
582 differences become too large. The boundary of entrainment would correspond to the  
583 segmentation boundary. How cells would sense the lack of entrainment is not known. Fgf is  
584 well known to control the somite boundary (Dubrulle et al, 2001) and recent experimental  
585 evidences in zebrafish show that the spatial difference in Fgf activity is constant at the  
586 determination front (Simzek and Özbudak, 2018). In mice, Fgf signaling activity is dynamic  
587 and has been shown to be dependent on Notch activity via *Hes7* expression (Niwa et al,  
588 2011). This suggests the possibility that Fgf and Notch work together to form a decoding  
589 mechanism of spatial differences in signaling activity between neighboring cells. The  
590 molecular mechanisms underlying such a decoder mechanism require further theoretical and  
591 experimental investigation.

592

## 593 **Material and methods**

### 594 **Experimental data**

595 Experimental data was obtained from previous published manuscripts. Data from *in vivo*  
596 mouse segmentation was obtained from (Tam 1981), *ex vivo* explants from (Lauschke et al,  
597 2013) and different species from (Gomez et al, 2008). Data were extracted from original  
598 manuscripts using WebPlotDigitizer 4.1 online tool (<https://apps.automeris.io/wpd/>).

599

600 **Parameter values**

601 **Table 1. Parameter values used in the simulations, unless indicated otherwise.**

| Parameters            | Figure 3 (WT, MMC) | Figure 4,5,6                 | Figure 7           |
|-----------------------|--------------------|------------------------------|--------------------|
| $\alpha$ or $\alpha'$ | 145, 100 min       | 160 min                      | 240 $\mu\text{m}$  |
| $\beta$ or $\beta'$   | 1154, 1092 min     | 1200 min                     | 2470 $\mu\text{m}$ |
| $g$                   | from data          | 1.5 $\mu\text{m}/\text{min}$ | -----              |
| $T_0$                 | 81, 71 min         | 100 min                      | 130 min            |
| $\vartheta/A_0$       | 1.0, 0.92          | 1.0                          | 0.05               |
| $Y$                   | 37, 37 min         | 30 min                       | -----              |

602

603 **Code availability**

604 The simulations were evaluated in Python and all source codes are presented as Jupyter  
605 notebooks (<http://jupyter.org/>) for easy visualization and are freely available at:  
606 [https://git.bsse.ethz.ch/iber/Publications/2018Boareto\\_AmplitudeModelSomitogenesis](https://git.bsse.ethz.ch/iber/Publications/2018Boareto_AmplitudeModelSomitogenesis)

607

608 **Parameter estimation**

609 In order to estimate the parameters of our model that best fit the experimental data, we  
610 defined a cost function based on the Euclidean distance between the experimental and the  
611 theoretical data points. We then found the parameters that minimize this cost function by  
612 using the Python library (`scipy.optimize.minimize`). For more details, please see the source  
613 code: [https://git.bsse.ethz.ch/iber/Publications/2018Boareto\\_AmplitudeModelSomitogenesis](https://git.bsse.ethz.ch/iber/Publications/2018Boareto_AmplitudeModelSomitogenesis)

614

615 **Acknowledgements**

616 The authors thank members of Iber lab for comments. M.B. thanks T. A. Amor for helping with  
617 the figures. This work was supported by the SystemX.ch of the Schweizerischer  
618 Nationalfonds zur Förderung der Wissenschaftlichen Forschung (Swiss National Science  
619 Foundation) and the NeuroStemX project.

620

621 **Competing interests**

622 The authors declare no competing or financial interests.

623

624 **Author contributions**

625 Conceptualization: M.B., T.T. and D.I.; Performed research: M.B. and T.T.; Developed the  
626 theoretical framework: M.B.; Writing: M.B. and D.I.; Funding acquisition and project  
627 administration: D.I.

628

629

630

## 631 **References**

- 632 Akiyama, R., Masuda, M., Tsuge, S., Bessho, Y. and Matsui, T., 2014. An anterior limit of FGF/Erk  
633 signal activity marks the earliest future somite boundary in zebrafish. *Development*, 141(5), pp.1104-  
634 1109.
- 635  
636 Amin, S., Neijts, R., Simmini, S., van Rooijen, C., Tan, S.C., Kester, L., van Oudenaarden, A.,  
637 Creyghton, M.P. and Deschamps, J., 2016. Cdx and T brachyury co-activate growth signaling in the  
638 embryonic axial progenitor niche. *Cell reports*, 17(12), pp.3165-3177.
- 639  
640 Andersson, E.R., Sandberg, R. and Lendahl, U., 2011. Notch signaling: simplicity in design, versatility in  
641 function. *Development*, 138(17), pp.3593-3612.
- 642  
643 Aulehla, A., Wehrle, C., Brand-Saber, B., Kemler, R., Gossler, A., Kanzler, B. and Herrmann, B.G.,  
644 2003. Wnt3a plays a major role in the segmentation clock controlling somitogenesis. *Developmental*  
645 *cell*, 4(3), pp.395-406.
- 646  
647 Bajard, L., Morelli, L.G., Ares, S., Pécéréaux, J., Jülicher, F. and Oates, A.C., 2014. Wnt-regulated  
648 dynamics of positional information in zebrafish somitogenesis. *Development*, 141(6), pp.1381-1391.
- 649  
650 Beaupeux, M. and François, P., 2016. Positional information from oscillatory phase shifts: insights from  
651 in silico evolution. *Physical biology*, 13(3), p.036009.
- 652  
653 Berg, R.E., 1991. Pendulum waves: A demonstration of wave motion using pendula. *Am. J. Phys*, 59(2),  
654 pp.186-187.
- 655  
656 Bessho, Y., Sakata, R., Komatsu, S., Shiota, K., Yamada, S. and Kageyama, R., 2001. Dynamic  
657 expression and essential functions of Hes7 in somite segmentation. *Genes & development*, 15(20),  
658 pp.2642-2647.
- 659  
660 Cooke, J., 1975. Control of somite number during morphogenesis of a vertebrate, *Xenopus*  
661 *laevis*. *Nature*, 254(5497), p.196.
- 662  
663 Cooke, J. and Zeeman, E. C. 1976. A clock and wavefront model for control of the number of  
664 repeated structures during animal morphogenesis. *J. Theor. Biol.* 58, 455–476.
- 665  
666 Delaune, E. A., François, P., Shih, N. P. and Amacher, S. L. 2012. Single-cell-resolution imaging of the  
667 impact of Notch signaling and mitosis on segmentation clock dynamics. *Dev. Cell* 23, 995-1005.
- 668  
669 Dequéant, M.L., Glynn, E., Gaudenz, K., Wahl, M., Chen, J., Mushegian, A. and Pourquié, O., 2006. A  
670 complex oscillating network of signaling genes underlies the mouse segmentation  
671 clock. *science*, 314(5805), pp.1595-1598.
- 672  
673 Dubrulle, J. and Pourquié, O., 2004. fgf8 mRNA decay establishes a gradient that couples axial  
674 elongation to patterning in the vertebrate embryo. *Nature*, 427(6973), p.419.
- 675  
676 Dubrulle, J., McGrew, M. J. and Pourquie, O. 2001. FGF signaling controls somite boundary position  
677 and regulates segmentation clock control of spatiotemporal Hox gene activation. *Cell* 106, 219–232.
- 678  
679 Flaten, J.A. and Parendo, K.A., 2001. Pendulum waves: A lesson in aliasing. *American Journal of*  
680 *Physics*, 69(7), pp.778-782.
- 681  
682 Forsberg, H., Crozet, F. and Brown, N.A., 1998. Waves of mouse Lunatic fringe expression, in four-hour  
683 cycles at two-hour intervals, precede somite boundary formation. *Current biology*, 8(18), pp.1027-1030.
- 684  
685 Gibb, S., Zagorska, A., Melton, K., Tenin, G., Vacca, I., Trainor, P., Maroto, M. and Dale, J.K., 2009.  
686 Interfering with Wnt signalling alters the periodicity of the segmentation clock. *Developmental biology*,  
687 330(1), pp.21-31.
- 688

- 689 Giudicelli, F., Özbudak, E.M., Wright, G.J. and Lewis, J., 2007. Setting the tempo in development: an  
690 investigation of the zebrafish somite clock mechanism. *PLoS biology*, 5(6), p.e150.  
691
- 692 Gomez, C., Özbudak, E.M., Wunderlich, J., Baumann, D., Lewis, J. and Pourquié, O., 2008. Control of  
693 segment number in vertebrate embryos. *Nature*, 454(7202), pp.335-339.  
694
- 695 Gomez, C. and Pourquié, O., 2009. Developmental control of segment numbers in vertebrates. *Journal*  
696 *of Experimental Zoology Part B: Molecular and Developmental Evolution*, 312(6), pp.533-544.  
697
- 698 Goodwin, B. C., and Cohen, M. H. 1969. A phase-shift model for the spatial and temporal organization  
699 of developing systems. *Journal of Theoretical Biology*, 25(1), 49-107.  
700
- 701 Hirata, H., Yoshiura, S., Ohtsuka, T., Bessho, Y., Harada, T., Yoshikawa, K. and Kageyama, R. 2002.  
702 Oscillatory expression of the bHLH factor Hes1 regulated by a negative feedback loop. *Science* 298,  
703 840-843. doi:10.1126/science.1074560  
704
- 705 Jiang, Y.J., Aerne, B.L., Smithers, L., Haddon, C., Ish-Horowicz, D. and Lewis, J., 2000. Notch  
706 signalling and the synchronization of the somite segmentation clock. *Nature*, 408(6811), p.475.  
707
- 708 Jörg, D.J., Oates, A.C. and Jülicher, F., 2016. Sequential pattern formation governed by signaling  
709 gradients. *Physical biology*, 13(5), p.05LT03.  
710
- 711 Jörg, D.J., Morelli, L.G., Soroldoni, D., Oates, A.C. and Jülicher, F., 2015. Continuum theory of gene  
712 expression waves during vertebrate segmentation. *New journal of physics*, 17(9), p.093042.  
713
- 714 Kageyama, R., Ohtsuka, T. and Kobayashi, T., 2007. The Hes gene family: repressors and oscillators  
715 that orchestrate embryogenesis. *Development*, 134(7), pp.1243-1251.  
716
- 717 Kawamura, A., Koshida, S., Hijikata, H., Sakaguchi, T., Kondoh, H. and Takada, S., 2005. Zebrafish  
718 hairy/enhancer of split protein links FGF signaling to cyclic gene expression in the periodic  
719 segmentation of somites. *Genes & development*, 19(10), pp.1156-1161.  
720
- 721 Krol, A.J., Roellig, D., Dequéant, M.L., Tassy, O., Glynn, E., Hattem, G., Mushegian, A., Oates, A.C.  
722 and Pourquié, O., 2011. Evolutionary plasticity of segmentation clock networks. *Development*, 138(13),  
723 pp.2783-2792.  
724
- 725 Lauschke, V.M., Tsiarris, C.D., François, P. and Aulehla, A., 2013. Scaling of embryonic patterning  
726 based on phase-gradient encoding. *Nature*, 493(7430), p.101.  
727
- 728 Lewis, J., 2003. Autoinhibition with transcriptional delay: a simple mechanism for the zebrafish  
729 somitogenesis oscillator. *Current Biology*, 13(16), pp.1398-1408.  
730
- 731 Manning, C.S., Biga, V., Boyd, J., Kursawe, J., Ymisson, B., Spiller, D.G., Sanderson, C.M., Galla, T.,  
732 Rattray, M. and Papalopulu, N., 2018. Quantitative, real-time, single cell analysis in tissue reveals  
733 expression dynamics of neurogenesis. *bioRxiv*, p.373407.  
734
- 735 Masamizu, Y., Ohtsuka, T., Takashima, Y., Nagahara, H., Takenaka, Y., Yoshikawa, K., Okamura, H.  
736 and Kageyama, R., 2006. Real-time imaging of the somite segmentation clock: revelation of unstable  
737 oscillators in the individual presomitic mesoderm cells. *Proceedings of the National Academy of*  
738 *Sciences*, 103(5), pp.1313-1318.  
739
- 740 McGrew, M.J., Dale, J.K., Fraboulet, S. and Pourquié, O., 1998. The lunatic fringe gene is a target of  
741 the molecular clock linked to somite segmentation in avian embryos. *Current Biology*, 8(17), pp.979-  
742 982.  
743
- 744 Morimoto, M., Takahashi, Y., Endo, M. & Saga, Y. 2005. The Mesp2 transcription factor establishes  
745 segmental borders by suppressing Notch activity. *Nature*. 435, 354-359.  
746

- 747 Naiche, L. A., Holder, N. & Lewandoski, M. 2011. FGF4 and FGF8 comprise the wavefront activity  
748 that controls somitogenesis. *Proc. Natl Acad. Sci. USA*. 108, 4018–4023.  
749
- 750 Niwa, Y., Masamizu, Y., Liu, T., Nakayama, R., Deng, C.X. and Kageyama, R., 2007. The initiation and  
751 propagation of Hes7 oscillation are cooperatively regulated by Fgf and notch signaling in the somite  
752 segmentation clock. *Developmental cell*, 13(2), pp.298-304.  
753
- 754 Oates, A.C. and Ho, R.K., 2002. Hairy/E (spl)-related (Her) genes are central components of the  
755 segmentation oscillator and display redundancy with the Delta/Notch signaling pathway in the formation  
756 of anterior segmental boundaries in the zebrafish. *Development*, 129(12), pp.2929-2946.  
757
- 758 Oates, A.C., Morelli, L.G. and Ares, S., 2012. Patterning embryos with oscillations: structure, function  
759 and dynamics of the vertebrate segmentation clock. *Development*, 139(4), pp.625-639.  
760
- 761 Pais-de-Azevedo, T., Magno, R., Duarte, I. and Palmeirim, I., 2018. Recent advances in understanding  
762 vertebrate segmentation. *F1000Research*, 7.  
763
- 764 Palmeirim, I., Henrique, D., Ish-Horowicz, D. and Pourquié, O. 1997. Avian hairy gene expression  
765 identifies a molecular clock linked to vertebrate segmentation and somitogenesis. *Cell*, 91(5), pp.639-  
766 648.  
767
- 768 Primmett, D.R., Stern, C.D. and Keynes, R.J., 1988. Heat shock causes repeated segmental anomalies  
769 in the chick embryo. *Development*, 104(2), pp.331-339.  
770
- 771 Riedel-Kruse, I.H., Müller, C. and Oates, A.C., 2007. Synchrony dynamics during initiation, failure, and  
772 rescue of the segmentation clock. *Science*, 317(5846), pp.1911-1915.  
773
- 774 Roy, M.N., Prince, V.E. and Ho, R.K., 1999. Heat shock produces periodic somitic disturbances in the  
775 zebrafish embryo. *Mechanisms of development*, 85(1-2), pp.27-34.  
776
- 777 Sawada, A., Shinya, M., Jiang, Y.J., Kawakami, A., Kuroiwa, A. and Takeda, H., 2001. Fgf/MAPK  
778 signalling is a crucial positional cue in somite boundary formation. *Development*, 128(23), pp.4873-  
779 4880.  
780
- 781 Schröter, C., Herrgen, L., Cardona, A., Brouhard, G.J., Feldman, B. and Oates, A.C., 2008. Dynamics of  
782 zebrafish somitogenesis. *Developmental Dynamics*, 237(3), pp.545-553.  
783
- 784 Shimojo, H., Isomura, A., Ohtsuka, T., Kori, H., Miyachi, H. and Kageyama, R., 2016. Oscillatory control  
785 of Delta-like1 in cell interactions regulates dynamic gene expression and tissue morphogenesis. *Genes  
786 & development*, 30(1), pp.102-116.  
787
- 788 Simsek, M.F. and Özbudak, E.M., 2018. Spatial Fold Change of FGF Signaling Encodes Positional  
789 Information for Segmental Determination in Zebrafish. *Cell reports*, 24(1), pp.66-78.  
790
- 791 Sonnen, K.F., Lauschke, V.M., Uraji, J., Falk, H.J., Petersen, Y., Funk, M.C., Beaupeux, M., François,  
792 P., Merten, C.A. and Aulehla, A. 2018. Modulation of Phase Shift between Wnt and Notch Signaling  
793 Oscillations Controls Mesoderm Segmentation. *Cell*, 172(5), pp.1079-1090.  
794
- 795 Soroldoni, D., Jörg, D.J., Morelli, L.G., Richmond, D.L., Schindelin, J., Jülicher, F. and Oates, A.C.,  
796 2014. A Doppler effect in embryonic pattern formation. *Science*, 345(6193), pp.222-225.  
797
- 798 Shih, N. P., François, P., Delaune, E. A. and Amacher, S. L. 2015. Dynamics of the slowing  
799 segmentation clock reveal alternating two-segment periodicity. *Development* 142, 1785-1793.  
800
- 801 Takahashi, Y., Koizumi, K.I., Takagi, A., Kitajima, S., Inoue, T., Koseki, H. and Saga, Y., 2000.  
802 Mesp2 initiates somite segmentation through the Notch signalling pathway. *Nature genetics*, 25(4),  
803 p.390.  
804

- 805 Takke, C. and Campos-Ortega, J.A., 1999. *her1*, a zebrafish pair-rule like gene, acts downstream of  
806 notch signalling to control somite development. *Development*, 126(13), pp.3005-3014.  
807  
808 Tam, P.P.L., 1981. The control of somitogenesis in mouse embryos. *Development*, 65(Supplement),  
809 pp.103-128.  
810  
811 Tomka, T., Iber, D. and Boareto, M., 2018. Travelling waves in somitogenesis: collective cellular  
812 properties emerge from time-delayed juxtacrine oscillation coupling. *Progress in Biophysics and*  
813 *Molecular Biology*.  
814  
815 Tsiairis, C.D. and Aulehla, A., 2016. Self-organization of embryonic genetic oscillators into  
816 spatiotemporal wave patterns. *Cell*, 164(4), pp.656-667.  
817  
818 Yasuhiko, Y. *et al.* 2006. Tbx6-mediated Notch signaling controls somite-specific *Mesp2* expression.  
819 *Proc. Natl Acad. Sci. USA* 103, 3651–3656.  
820  
821 Wiedermann, G., Bone, R.A., Silva, J.C., Bjorklund, M., Murray, P.J. and Dale, J.K., 2015. A balance  
822 of positive and negative regulators determines the pace of the segmentation clock. *eLife*, 4.  
823  
824 Wolpert, L., 1969. Positional information and the spatial pattern of cellular differentiation. *Journal of*  
825 *theoretical biology*, 25(1), pp.1-47.  
826  
827  
828  
829 **Supplementary Information**

830

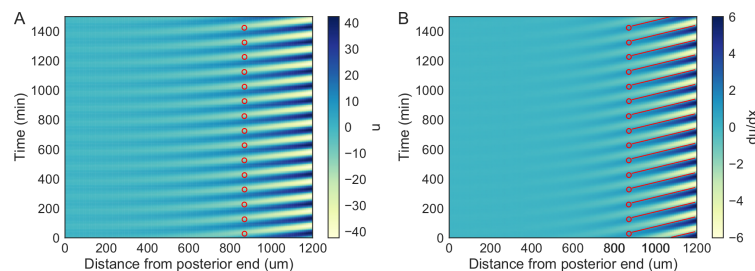

831

832 **Figure S1. Properties of the oscillators during segmentation.** A) Levels of the oscillators  
833 and B) its spatial derivative as a function of time and position related to the posterior end. Red  
834 dots and lines represent the position of formation of a new segment, i.e., where  $du/dx = \theta$ .  
835 Note that the caudal cells reach the threshold before the rostral cells within a somite length.  
836 The distance between the previous somite and the first most caudal cell to reach the  
837 threshold define the somite size.

838



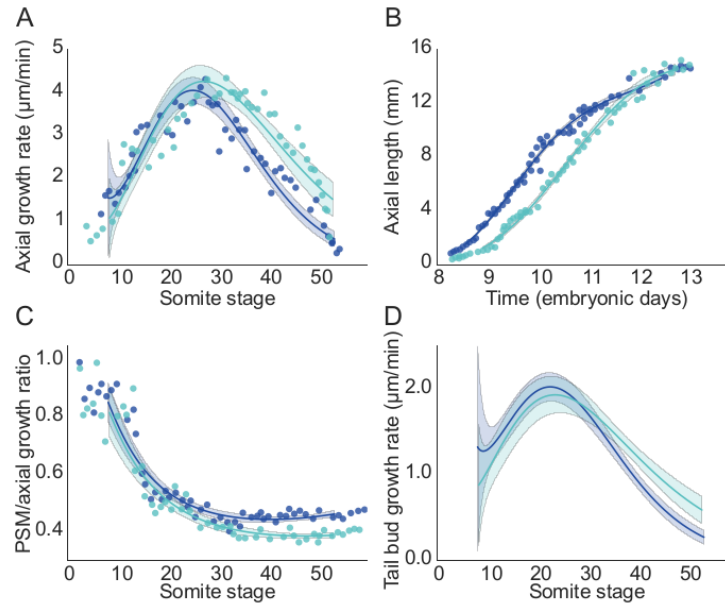

839

840 **Figure S2. Growth profiles of WT and MMC-treated embryos.** A) Axial growth rate for  
841 different somite stages. B) Axial length for different embryonic times. C) Fraction of growth  
842 rate due to tail bud elongation for different somite stages. D) Tail bud growth rate for different  
843 somite stages inferred by scaling the axial growth rate with the relative growth due to tail bud  
844 elongation. A-C) Points represent data from (Tam 1981), solid line represents average fit and  
845 area represents 95% confidence interval of a bootstrap fit. Dark blue represents WT and light  
846 green represents MMC-treated embryos.

847

848

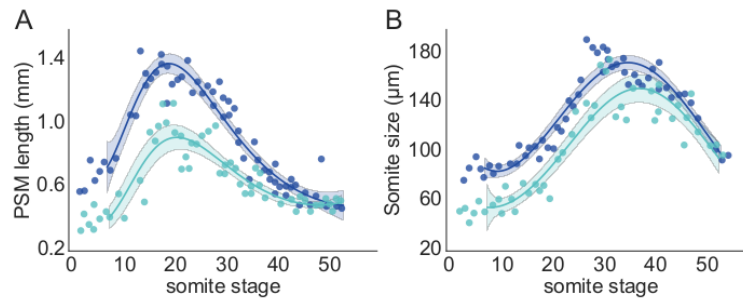

849

850 **Figure S3. PSM length and somite size profile of WT and MMC-treated embryos.** A)  
851 PSM length for different somite stages. B) Somite size for different somite stages. Points  
852 represent data from Tam 1981, solid line represents average fit and area represents 95%  
853 confidence interval of a bootstrap fit. Dark blue represents WT and light green represents  
854 MMC-treated embryos.

855

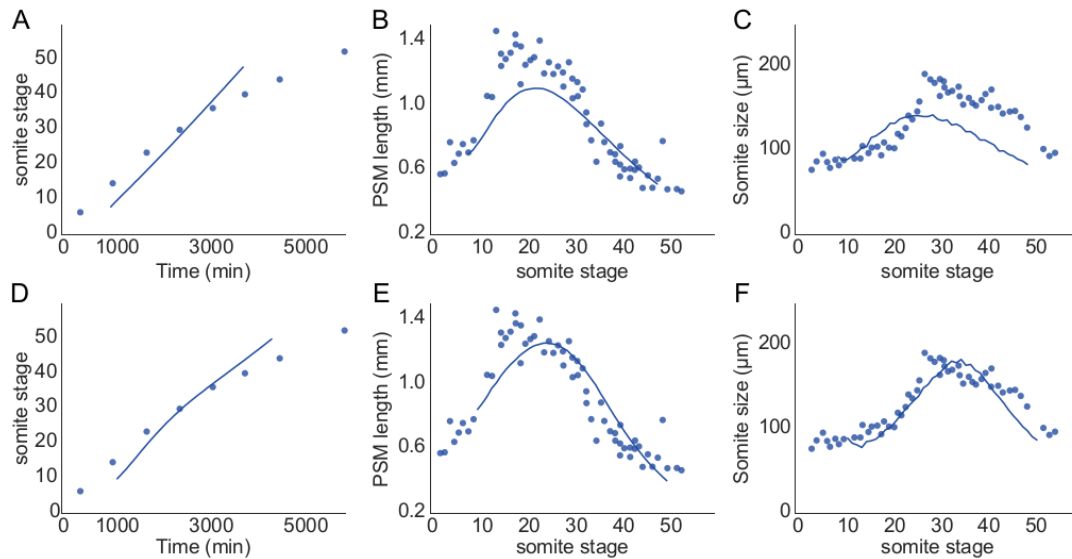

856

857

**Figure S4. Fit of mouse in vivo segmentation data.** A,D) Relationship between somite stage and embryonic time. B-E) PSM length at different somite stages. C,F) Somite size at different somite stages. Circles represent data from (Tam 1981) and lines represent the fit from the modeling using the average value of tail bud growth rate as input. A-C) Modeling results when considering constant period and amplitude at the tail bud. D-F) Modeling results when considering that the period and amplitude at the tail bud are dynamic and dependent on the tail bud growth rate.

864

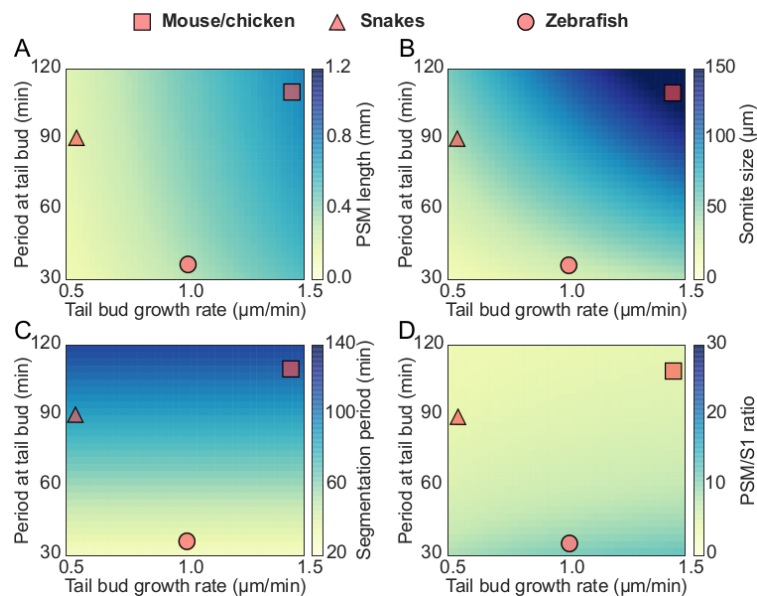

865

866

**Figure S5. A) PSM length, B) somite size, C) segmentation period and D) PSM/somite size ratio for different values of growth rate and period at the tail bud. The characteristic length of amplitude and period gradient is remained constant (same values of Figure 3, see Table 1). Note that in this case, our model would predict that snakes would have a much smaller PSM length (around 300  $\mu\text{m}$ ). This is in contrast with experimental evidences showing that snakes have a PSM length of around 1200  $\mu\text{m}$  (Gomez et al, 2008).**

872

873

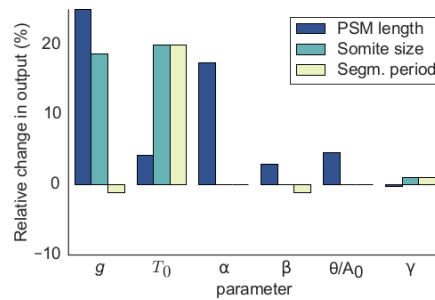

874

875 **Figure S6. Sensitive analysis by considering the period and amplitude at the tail bud is**  
 876 **dependent on the growth rate.** The extra parameter  $\gamma$  has little effect on PSM length,  
 877 somite size and segmentation period.

878

### 879 Static period gradient in *ex vivo* explants

880 In our analysis, we represented the period gradient observed in *ex vivo* explants as static, i.e.,  
 881 the period gradient does not change temporally, only spatially. This is in contrast to what is  
 882 proposed in (Lauschke et al, 2013), where the authors infer a dynamic, exponentially  
 883 increasing period gradient. We reanalyzed the data from (Lauschke et al, 2013) and  
 884 concluded that their data is more consistent with a static period gradient. For this reason, we  
 885 consider the static case in our analysis.

886

887 In our model, we consider a spatial period gradient that is constant in time. In case of such a  
 888 static period gradient, the phase ( $\phi$ ) and the slope of the phase-gradient ( $\frac{d\phi}{dx}$ ) are linear in time  
 889 and are given by:  $\phi = \omega t$  and  $\frac{d\phi}{dx} = \frac{d\omega}{dx} t$ , respectively, where  $\omega = \omega(x)$  represents the  
 890 frequency of oscillations. To test whether the period is static or dynamic, one can therefore  
 891 plot the phase-gradient against time and evaluate the slope. If the slope is constant in time,  
 892 then the spatial frequency gradient,  $\frac{d\omega}{dx}$ , is constant in time, which would indicate a static  
 893 period and *vice versa*. Lauschke and co-workers observed a linear relationship between the  
 894 number of oscillations and time (Figure S7), and the phase-gradient can therefore be plotted  
 895 against the oscillation number.

896

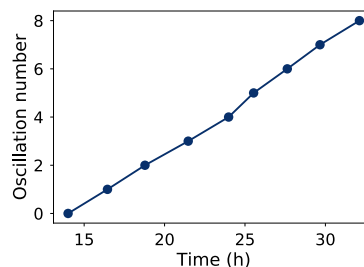

897

898 **Figure S7. Linear relationship between oscillation number and time.** Blue dots represent  
 899 the time of formation of a new segment (digitalized from Figure 4a, Lauschke et al, 2013).  
 900 The slope of the curve represents the time it takes to form a new segment and is  
 901 approximately the period at the center of the periphery (132 min, Lauschke et al, 2013, Figure  
 902 Supplementary 4).

903

904 Figure S8A shows the plot of the phase-gradient against the oscillation number. Here, the  
905 phase-gradient is plotted on a logarithmic scale. At first sight, the data may suggest a linear  
906 relationship on the logarithmic scale, and thus a non-linear relationship between the phase-  
907 gradient and time and a time-dependent period. However, a linear relationship (red curve) fits  
908 the data essentially as well, in particular when evaluated on a linear scale (Figure S8B). Why  
909 would a linear and an exponential curve be so similar? A linear relationship is clearly different  
910 from an exponential relationship only if the exponent in the exponential function is sufficiently  
911 large and the time period over which the function is observed is sufficiently long. This is not  
912 the case for the reported segmentation data: the experimentally determined time-dependency  
913 of the phase gradient can be fitted just as well by a linear function (Figure S8, red line), and  
914 we confirm that our model recapitulates this relationship just as well (Figure S9, red).

915

916 We note that the Lauschke and co-workers previously showed that the period at the center  
917 remains constant during the segmentation process (Lauschke et al, 2013, Figure  
918 Supplementary 4). We would argue that in light of this experimental observation, it is rather  
919 likely that the same applies also to the rest of the domain such that a static frequency  
920 gradient would be a better representation of the data.

921

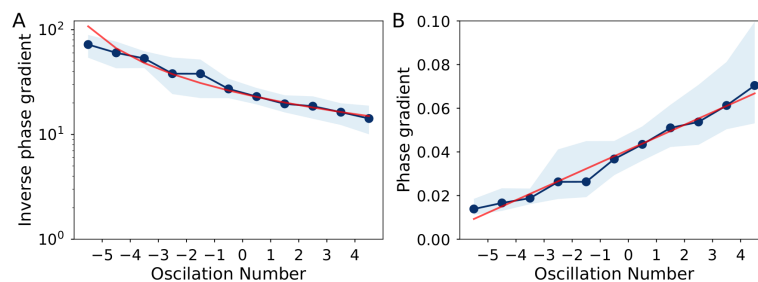

922

923 **Figure S8. Linear fit of spatial phase-gradient.** A) Inverse of the spatial phase-gradient as  
924 a function of oscillations number, as represented in (Lauschke et al, 2013, Figure 4b). Note  
925 that oscillation number is linearly proportional to time (Figure S7). B) Spatial phase-gradient  
926 as a function of oscillations number. Blue line represents experimental data and area  
927 represents the experimental standard deviation and red line represents a linear fit. Negative  
928 oscillation numbers represent a spatial projection of incomplete segmentations (Lauschke et  
929 al, 2013).

930

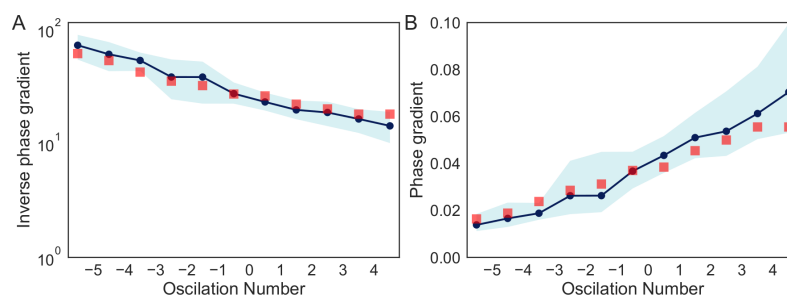

931

932 **Figure S9. Spatial phase-gradient in time.** A) Inverse of the spatial phase-gradient as a  
933 function of oscillations number, as represented in (Lauschke et al, 2013, Figure 4b). B)  
934 Spatial phase-gradient as a function of oscillations number. Blue line represents experimental  
935 data and area represents the experimental standard deviation. Red dots represent the  
936 relationship obtained by our model.
